# Supplementary material for: Opuntia dillenii (Ker Gawl.) Haw., Seeds Oil Antidiabetic Potential Using In Vivo, In Vitro, In Situ, and Ex Vivo Approaches to Reveal Its Underlying Mechanism of Action
Source: PubMed Central journal article supplement (PMC8002680; doi:10.3390/molecules26061677), 2021-03-17
Supplement: molecules-26-01677-s001.pdf [file molecules-26-01677-s001.pdf]

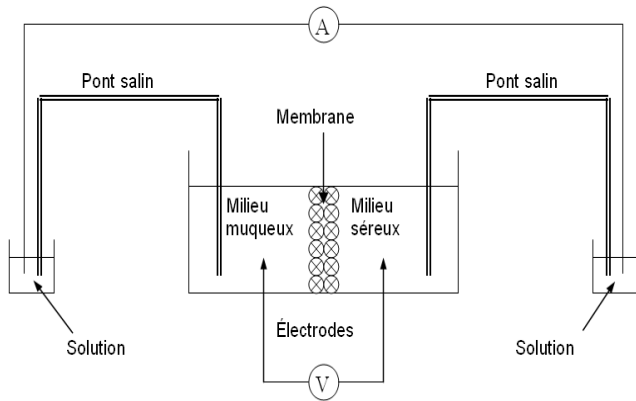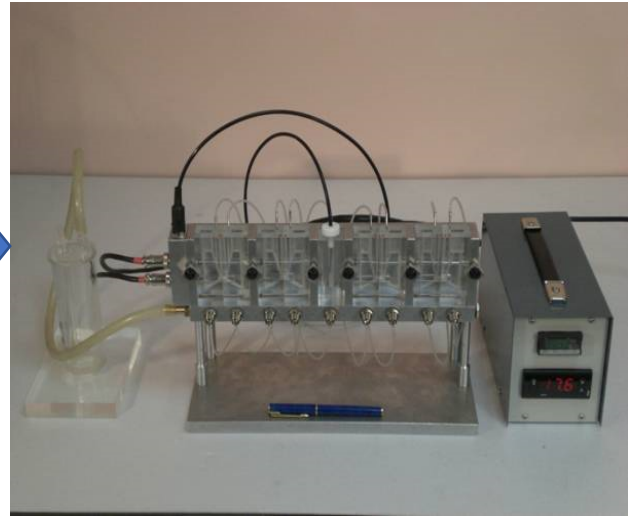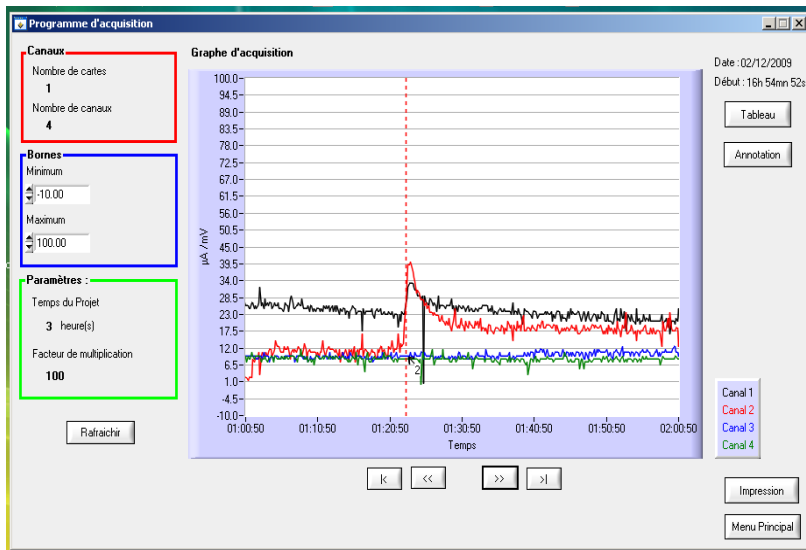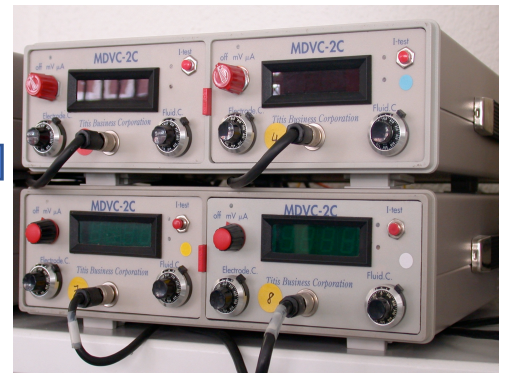

## Ussing Chamber assay
